# Supplementary material for: Exploring and Exploiting Disease Interactions from Multi-Relational Gene and Phenotype Networks
Source: PubMed Central journal article supplement (PMC3146471; doi:10.1371/journal.pone.0022670), 2011-07-29
Supplement: pone.0022670.s001.pdf [file pone.0022670.s001.pdf]

|                     |                  |                  |                  |                  |                  |
|---------------------|------------------|------------------|------------------|------------------|------------------|
| N - no edge         | $P(N-I,I)=0.433$ | $P(N-I,P)=0.363$ | $P(N-G,G)=0.438$ | $P(N-G,B)=0.347$ | $P(N-P,B)=0.283$ |
| I - is-a edge       | $P(I-I,I)=0.240$ | $P(I-I,P)=0.021$ | $P(I-G,G)=0.074$ | $P(I-G,B)=0.065$ | $P(I-P,B)=0.028$ |
| G - genetic edge    | $P(G-I,I)=0.034$ | $P(G-I,P)=0.006$ | $P(G-G,G)=0.169$ | $P(G-G,B)=0.103$ | $P(G-P,B)=0.016$ |
| P - phenotypic edge | $P(P-I,I)=0.184$ | $P(P-I,P)=0.533$ | $P(P-G,G)=0.174$ | $P(P-G,B)=0.282$ | $P(P-P,B)=0.567$ |
| B - both G and P    | $P(B-I,I)=0.110$ | $P(B-I,P)=0.077$ | $P(B-G,G)=0.146$ | $P(B-G,B)=0.204$ | $P(B-P,B)=0.107$ |
| $P(N)=.556$         | $P(N-I,G)=0.468$ | $P(N-I,B)=0.366$ | $P(N-G,P)=0.472$ | $P(N-P,P)=0.325$ | $P(N-B,B)=0.228$ |
| $P(I)=.020$         | $P(I-I,G)=0.074$ | $P(I-I,B)=0.054$ | $P(I-G,P)=0.009$ | $P(I-P,P)=0.024$ | $P(I-B,B)=0.065$ |
| $P(G)=.018$         | $P(G-I,G)=0.156$ | $P(G-I,B)=0.044$ | $P(G-G,P)=0.030$ | $P(G-P,P)=0.012$ | $P(G-B,B)=0.046$ |
| $P(P)=.359$         | $P(P-I,G)=0.110$ | $P(P-I,B)=0.337$ | $P(P-G,P)=0.422$ | $P(P-P,P)=0.567$ | $P(P-B,B)=0.429$ |
| $p(B)=.047$         | $P(B-I,G)=0.192$ | $P(B-I,B)=0.199$ | $P(B-G,P)=0.068$ | $P(B-P,P)=0.072$ | $P(B-B,B)=0.236$ |
